# Supplementary material
Source: Springer Nature journal article supplement (https://mijn.bsl.nl/resource/supplementary/13047_2012_481_MOESM3_ESM.pdf/7473930)

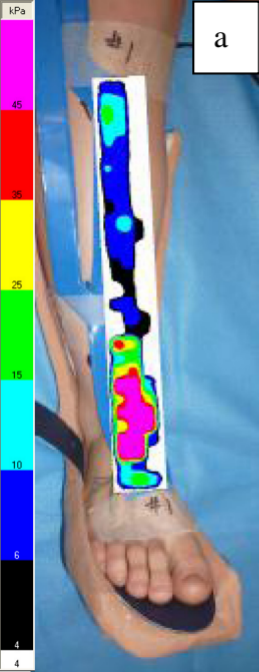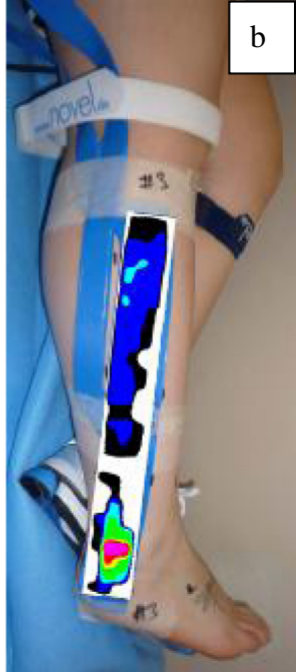

Supplement: MOESM3 [file 7473930]
